# Supplementary material
Source: HighWire-hosted journal article supplement (https://cmaj.ca/highwire/filestream/58321/field_highwire_adjunct_files/5/nursing-hu-6-at.pdf)
Supplement: nursing-hu-6-at.pdf [file nursing-hu-6-at.pdf]

## Appendix 6 (as submitted by the authors)

### *Mechanisms of Action*

Potential mechanisms for the observed associations remain speculative. Soon after their introduction, conventional antipsychotics were suspected of being involved in the development of arrhythmias, cardiac arrest, and sudden death.<sup>7-11</sup> Prolongation of cardiac repolarization and QTc intervals is thought to be responsible and is generally more common with conventional than atypical agents.<sup>12</sup>

Anticholinergic properties affecting blood pressure and heart rate, as well as sedation and extrapyramidal symptoms causing potential swallowing problems, are also more common with conventional than atypical agents.<sup>13-17</sup> For these reasons, cardiac (e.g., myocardial infarction and ventricular arrhythmias), cerebrovascular, and infection (e.g., aspiration pneumonia) outcomes may all be potential mediators of any increased risk of death from conventional compared with atypical agents. To date, some<sup>18-20</sup> but not all<sup>8,21,22</sup> epidemiologic studies comparing antipsychotics have found higher risks of ventricular arrhythmia, cardiac arrest and stroke with conventional versus atypical use. Although the present study confirmed the increased risk of non-cancer related mortality with conventional agents in the nursing home population, we were unable to confirm the role of the potential causal mediators, either because of insufficient evidence (i.e., ventricular arrhythmias, cardiac arrest, stroke) or because a positive association was not observed (i.e., pneumonia, heart failure, myocardial infarction).

Antipsychotic use may increase the risk of femur fracture through multiple mechanisms. The well established risk of extrapyramidal symptoms — including parkinsonism and akinesia, rigidity and unsteady gait — associated with the use of conventional antipsychotics is believed to mediate the risk of falls and femur fractures. Although evidence from clinical trials initially indicated a lower propensity of atypical agents to cause gait and movement disorders, there are data suggesting that the risk of developing extrapyramidal symptoms during treatment with atypical antipsychotics is clinically relevant, dose dependent and possibly equal to the risk associated with conventional antipsychotics among older adults with dementia. Atypical APM block D<sub>2</sub> receptors, but they also antagonize serotonergic, muscarinic, histaminergic, and  $\alpha_1$ -adrenergic receptors, leading to a possible risk of confusion, delirium, excessive sedation, and orthostatic hypotension, all of which are well established etiologic factors for falls and related femur fractures.<sup>23</sup>

Whether or not antidepressants increase cardiovascular morbidity and mortality is a current topic of debate. While cardiac events have been documented with the use of non-selective serotonin reuptake inhibitors such as tricyclic antidepressants,<sup>24</sup> evidence for a link with selective serotonin reuptake inhibitors is mixed.<sup>25</sup> As is the case for antipsychotics, prolongation of cardiac repolarization and QTc intervals has been postulated as a potential mechanism for increased arrhythmic mortality. Alternative explanations include the effect of depression itself rather than antidepressant use, and imperfect control for pre-existing cardiovascular co-morbidities which are known to be common in patients with depression.<sup>26</sup> Despite control for a wide range of cardiovascular and psychiatric co-morbidities, we observed an increased risk of non-cancer mortality compared with atypical antipsychotics. The effect remained after restricting the population to subjects without a history of depression (HR=1.24, 95% CI 0.98-1.58 in as-treated analyses).

An increased risk for femur fracture has previously been demonstrated for both tricyclic antidepressants and selective serotonin reuptake inhibitor users.<sup>27-31</sup> The explanation may be simply an increased risk of falls resulting from psychomotor impairment and orthostasis, dizziness or altered sleep patterns.<sup>32-34</sup> Another possible explanation is the effect of antidepressants on bone physiology through inhibition of the 5-hydroxytryptamine transporter system. Stronger inhibition of the 5-hydroxytryptamine transporter could cause a greater disruption of the balance between osteoblasts and osteoclasts and hence have a greater detrimental effect on bone micro-architecture.<sup>35</sup>

Benzodiazepines have been implicated as a cause of numerous adverse events, most importantly a worsening of memory loss, falls and hip fractures, even with shorter half-life agents, modest dosages, medium durations of use, and the newer sedative hypnotics.<sup>36</sup> We observed a fracture risk at least as high as that of users of atypical antipsychotics. Since atypical antipsychotics users have been shown to be at increased risk of hip fracture compared with non-users,<sup>23</sup> our findings indicate an increased fracture risk for benzodiazepine users, with the risk being the same order of magnitude as that of atypical antipsychotics users.

We are unaware of previous research documenting an increased risk of heart failure with benzodiazepine use. The effect remained, and was in fact stronger, when restricting the population to subjects without a documented history of heart failure. Further research is needed to determine whether this might be a chance finding.

## References

1. Kiyota Y, Schneeweiss S, Glynn RJ, Cannuscio CC, Avorn J, Solomon DH. Accuracy of medicare claims-based diagnosis of acute myocardial infarction: Estimating positive predictive value on the basis of review of hospital records. *American Heart Journal* 2004;148(1):99-104.
2. Lee D, Donovan L, Austin P, Gong Y, Liu P, Rouleau J, Tu J. Comparison of coding of heart failure and comorbidities in administrative and clinical data for use in outcomes research. *Medical Care* 2005;43(2):182-188.
3. De Bruin ML, van Hemel NM, Leufkens HGM, Hoes AW. Hospital discharge diagnoses of ventricular arrhythmias and cardiac arrest were useful for epidemiologic research. *Journal of Clinical Epidemiology* 2005;58(12):1325-1329.
4. Birman-Deych E, Waterman A, Yan Y, Nilasena D, Radford M, Gag B. Accuracy of ICD-9-CM codes for identifying cardiovascular and stroke risk factors. *Medical Care* 2005;43(5):480-485.
5. Leonard CE, Haynes K, Localio AR, Hennessy S, Tjia J, Cohen A, Kimmel SE, Feldman HI, Metlay JP. Diagnostic E-codes for commonly used, narrow therapeutic index medications poorly predict adverse drug events. *Journal of Clinical Epidemiology* 2008;61(6):561-571.
6. Skull S, Andrews R, Byrnes G, Campbell D, Nolan T, Brown G, Kelly H. ICD-10 codes are a valid tool for identification of pneumonia in hospitalized patients aged  $\geq 65$  years. *Epidemiology and Infection* 2008;136(02):232-240.
7. Kelly H, Fay J, Lavery S. Thioridazine hydrochloride (Mellaril): Its effects on the electrocardiogram and a report of two fatalities with electrocardiographic abnormalities. *Canadian Medical Association Journal* 1963;89:546-554.
8. Hennessy S, Bilker W, Knauss J, Margolis D, Kimmel S, Reynolds R, Glasser D, Morrison M, Strom B. Cardiac arrest and ventricular arrhythmia in patients taking antipsychotic drugs: cohort study using administrative data. *BMJ: British Medical Journal* 2002;325(7372):1070.
9. Straus SMJM, Bleumink GS, Dieleman JP, van der Lei J, t Jong GW, Kingma JH, Sturkenboom MCJM, Stricker BHC. Antipsychotics and the risk of sudden cardiac death. *Archives of Internal Medicine* 2004;164(12):1293-1297.
10. Reilly J, Ayis S, Ferrier I, Jones S, Thomas S. Thioridazine and sudden unexplained death in psychiatric in-patients. *The British Journal of Psychiatry* 2002;180:515-522.
11. Ray WA, Meredith S, Thapa PB, Meador KG, Hall K, Murray KT. Antipsychotics and the risk of sudden cardiac death. *Archives of General Psychiatry* 2001;58(12):1161-1167.
12. Kuehn BM. FDA warns antipsychotic drugs may be risky for elderly. *JAMA: The Journal of the American Medical Association* 2005;293(20):2462.
13. Alexopoulos G, Streim J, Carpenter D, Docherty J. Expert Consensus Panel for Using Antipsychotic Drugs in Older Patients. Using antipsychotic agents in older patients. *The Journal of Clinical Psychiatry* 2004;65(Suppl 2):5-99.
14. Chan Y, Pariser S, Neufeld G. Atypical antipsychotics in older adults. *Pharmacotherapy* 1999;19:811-822.
15. Tariot P. The older patient: The ongoing challenge of efficacy and tolerability. *The Journal of Clinical Psychiatry* 1999;60(Suppl 23):29-33.
16. Maixner S, Mellow A, Tandon R. The efficacy, safety, and tolerability of antipsychotics in the elderly. *The Journal of Clinical Psychiatry* 1999;60(Suppl 8):29-41.

17. Lawlor B. Behavioral and psychological symptoms in dementia: The role of atypical antipsychotics. *The Journal of Clinical Psychiatry* 2004;65(Suppl 11):5-10.
18. Glassman AH, Bigger JT, Jr. Antipsychotic drugs: Prolonged QTc interval, torsade de pointes, and sudden death. *The American Journal of Psychiatry* 2001;158(11):1774-1782.
19. Liperoti R, Gambassi G, Lapane KL, Chiang C, Pedone C, Mor V, Bernabei R. Conventional and atypical antipsychotics and the risk of hospitalization for ventricular arrhythmias or cardiac arrest. *Archives of Internal Medicine* 2005;165(6):696-701.
20. Finkel S, Kozma C, Long S, Greenspan A, Mahmoud R, Baser O, Engelhart L. Risperidone treatment in elderly patients with dementia: Relative risk of cerebrovascular events versus other antipsychotics. *International Psychogeriatrics* 2005;17(4):617-629.
21. Herrmann N, Mamdani M, Lanctot KL. Atypical antipsychotics and risk of cerebrovascular accidents. *The American Journal of Psychiatry* 2004;161(6):1113-1115.
22. Liperoti R, Gambassi G, Lapane K, Chiang C, Pedone C, Mor V, Bernabei R. Cerebrovascular events among elderly nursing home patients treated with conventional or atypical antipsychotics. *The Journal of Clinical Psychiatry* 2005;66(9):1090-1096.
23. Liperoti R, Onder G, Lapane K, Mor V, Friedman J, Bernabei R, Gambassi G. Conventional or atypical antipsychotics and the risk of femur fracture among elderly patients: Results of a case-control study. *The Journal of Clinical Psychiatry* 2007;68(6):929-934.
24. Cohen H, Gibson G, Alderman M. Excess risk of myocardial infarction in patients treated with antidepressant medications: Association with use of tricyclic agents. *American Journal of Medicine* 2000;108:2-8.
25. Swenson J, Doucette S, Fergusson D. Adverse cardiovascular events in antidepressant trials involving high-risk patients: A systematic review of randomized trials. *Canadian Journal of Psychiatry* 2006;51(923-929).
26. Narayan SM, Stein MB. Do Depression or Antidepressants Increase Cardiovascular Mortality?: The Absence of Proof Might Be More Important Than the Proof of Absence. *Journal of the American College of Cardiology* 2009;53(11):959-961.
27. Ensrud KE, Blackwell T, Mangione CM, Bowman PJ, Bauer DC, Schwartz A, Hanlon JT, Nevitt MC, Whooley MA. Central nervous system active medications and risk for fractures in older women. *Archives of Internal Medicine* 2003;163(8):949-957.
28. Hubbard R, Farrington P, Smith C, Smeeth L, Tattersfield A. Exposure to tricyclic and selective serotonin reuptake inhibitor antidepressants and the risk of hip fracture. *American Journal of Epidemiology* 2003;158(1):77-84.
29. Liu B, Anderson G, Mittmann N, To T, Axcell T, Shear N. Use of selective serotonin-reuptake inhibitors of tricyclic antidepressants and risk of hip fractures in elderly people. *The Lancet* 1998;351(9112):1303-1307.
30. Richards JB, Papaioannou A, Adachi JD, Joseph L, Whitson HE, Prior JC, Goltzman D, for the Canadian Multicentre Osteoporosis Study Research G. Effect of selective serotonin reuptake inhibitors on the risk of fracture. *Archives of Internal Medicine* 2007;167(2):188-194.
31. Thapa PB, Gideon P, Cost TW, Milam AB, Ray WA. Antidepressants and the risk of falls among nursing home residents. *The New England Journal of Medicine* 1998;339(13):875-882.
32. Laursen A, Mikkelsen P, Rasmussen S, le Fèvre Honoré P. Paroxetine in the treatment of depression: A randomized comparison with amitriptyline. *Acta Psychiatrica Scandinavica* 1985;71(3):249-255.

33. Stone K, Ewing S, Lui L-Y, Ensrud K, Ancoli-Israel S, Bauer D, Cauley J, Hillier T, Cummings S. Self-reported sleep and nap habits and risk of falls and fractures in older women: The Study of Osteoporotic Fractures. *Journal of the American Geriatrics Society* 2006;54(8):1177-1183.
34. Ensrud K, Blackwell T, Ancoli-Israel S, Redline S, Yaffe K, Diem S, Claman D, Stone K. Use of selective serotonin reuptake inhibitors and sleep disturbances in community-dwelling older women. *Journal of the American Geriatrics Society* 2006;54(10):1508-1515.
35. van den Brand M, Samson M, Pouwels S, van Staa T, Thio B, Cooper C, Leufkens H, Egberts A, Verhaar H, de Vries F. Use of anti-depressants and the risk of fracture of the hip or femur. *Osteoporosis International* 2009;20(10):1705-1713.
36. Wang PS, Bohn RL, Glynn RJ, Mogun H, Avorn J. Hazardous benzodiazepine regimens in the elderly: Effects of half-life, dosage, and duration on risk of hip fracture. *The American Journal of Psychiatry* 2001;158(6):892-898.
